# Supplementary material
Source: HighWire-hosted journal article supplement (http://www.cmaj.ca/highwire/filestream/58065/field_highwire_adjunct_files/1/cdiff-online-1-tt.pdf)
Supplement: cdiff-online-1-tt.pdf [file cdiff-online-1-tt.pdf]

**e-Table 1: Summary of randomized controlled trials where prevention or treatment of *Clostridium difficile*-associated diarrhea (CDAD) was the primary or secondary outcome**

| Trial;<br>primary<br>outcome                      | Probiotic and<br>duration<br>(formulation,<br>CFU/d)                                                                                                       | Outcome<br>measure (length<br>of follow-up)                                                     | Results                              |                              |                                                    | Compliance and<br>adverse effects                                                                                                 | Quality<br>score* | Comments                                                                                                                                                                                                           |
|---------------------------------------------------|------------------------------------------------------------------------------------------------------------------------------------------------------------|-------------------------------------------------------------------------------------------------|--------------------------------------|------------------------------|----------------------------------------------------|-----------------------------------------------------------------------------------------------------------------------------------|-------------------|--------------------------------------------------------------------------------------------------------------------------------------------------------------------------------------------------------------------|
|                                                   |                                                                                                                                                            |                                                                                                 | Probiotic<br>group, n/N<br>(%)       | Placebo<br>group, n/N<br>(%) | Risk difference<br>(95% CI)<br>(placebo–probiotic) |                                                                                                                                   |                   |                                                                                                                                                                                                                    |
| Primary outcome                                   |                                                                                                                                                            |                                                                                                 |                                      |                              |                                                    |                                                                                                                                   |                   |                                                                                                                                                                                                                    |
| Plummer et al, 2004; <sup>15</sup><br>prevention  | Lactobacillus acidophilus and Bifidobacterium bifidum for 20 d (capsule, 20 × 10 <sup>9</sup> CFU/d)                                                       | Presence of C. difficile (20 d)                                                                 | 11/69 (13.0)                         | 9/69 (15.9)                  | −2.8 (−8.7 to 15.3)                                | Not assessed                                                                                                                      | 3                 | No difference in toxin positivity between treatment arms among patients with positive culture; lower incidence of diarrhea reported among culture- and toxin-positive subjects in probiotic group; short follow-up |
| McFarland et al, 1994; <sup>16</sup><br>treatment | Saccharomyces boulardii for 4 wk (2 × 250 mg capsules, 30 × 10 <sup>9</sup> CFU/d)                                                                         | Diarrhea and at least 1 positive assay for C. difficile by culture, toxin A or toxin B (8 wk)   | 15/57 (26.3)                         | 30/64(46.9)                  | 20.5 (2.2 to 37.0)                                 | 11.3% noncompliant in probiotic group for an average of 2 d; more subjects in probiotic group experienced thirst and constipation | 5                 | Concomitant use of different antibiotics for differing lengths of time; no difference in culture positivity between treatment arms but significantly fewer toxin B positive cases in probiotic group               |
|                                                   |                                                                                                                                                            |                                                                                                 | First-time CDAD:<br>6/31 (19.3)      | 8/33 (24.2)                  | 4.9 (−17.6 to 26.4)                                |                                                                                                                                   |                   |                                                                                                                                                                                                                    |
|                                                   |                                                                                                                                                            |                                                                                                 | Recurrent CDAD:<br>9/26 (34.6)       | 22/34 (64.7)                 | 30.0 (2.3 to 50.6)                                 |                                                                                                                                   |                   |                                                                                                                                                                                                                    |
| Surawicz et al, 2000; <sup>17</sup><br>treatment  | S. boulardii for 28 d (2 × 250 mg capsules, CFU/d not reported)                                                                                            | Diarrhea and at least 1 positive assay for C. difficile by culture, toxin A or toxin B (8 wk)   | 39/89 (43.8)                         | 37/69 (53.6)                 | 9.8 (−6.7 to 25.6)                                 | Compliance not reported; no significant difference in side effects between groups                                                 | 3                 | Concomitant antibiotic assigned to patients after randomization; no difference in culture or toxin positivity in high-dose vancomycin group; results not reported for other groups                                 |
|                                                   |                                                                                                                                                            |                                                                                                 | High-dose vancomycin:<br>3/18 (16.7) | 7/14 (50)                    | 33.0 (−0.3 to 62.0)                                |                                                                                                                                   |                   |                                                                                                                                                                                                                    |
|                                                   |                                                                                                                                                            |                                                                                                 | Low-dose vancomycin:<br>23/45 (51.1) | 17/38 (44.7)                 | −6.4 (−16.2 to 28.1)                               |                                                                                                                                   |                   |                                                                                                                                                                                                                    |
|                                                   |                                                                                                                                                            |                                                                                                 | Metronidazole:<br>13/26 (50.0)       | 13/27 (48.2)                 | −1.9 (−25.8 to 29.2)                               |                                                                                                                                   |                   |                                                                                                                                                                                                                    |
| Wullt et al, 2003; <sup>18</sup><br>treatment     | L. plantarum 299v for 38 d (fruit drink containing oats fermented with probiotic, 50 × 10 <sup>9</sup> CFU/d)                                              | Diarrhea (5–10 d)                                                                               | 1/12 (91.6)                          | 0/9 (100)                    | −8.3 (−40.3 to 29.6)                               | 80% harboured probiotic in fecal samples; no apparent side effects                                                                | 4                 | Small sample; no difference in culture positivity after treatment among 20 patients who had no diarrhea after 5–10 d                                                                                               |
|                                                   |                                                                                                                                                            | Positive assay for C. difficile toxins A or B (11–13 d)                                         | 5/12 (58.3)                          | 2/9 (77.8)                   | −19.4 (−64.7 to 15.5)                              |                                                                                                                                   |                   |                                                                                                                                                                                                                    |
| Secondary outcome                                 |                                                                                                                                                            |                                                                                                 |                                      |                              |                                                    |                                                                                                                                   |                   |                                                                                                                                                                                                                    |
| Surawicz et al, 1989 <sup>19</sup>                | S. boulardii starting within 48 h of beginning antibiotic until 2 wk post-antibiotic (2 × 250 mg capsules, 1 g/d)                                          | Acquired C. difficile after enrolment (duration of probiotic treatment, minimum of 8 d)         | 22/81 (27)                           | 5/36 (14)                    | −13.3 (−25.7 to 4.7)*                              | Compliance not reported; no side effects                                                                                          | 5                 | Probiotic resulted in a significant reduction in the risk of AAD; C. difficile tested only in those with ≥ 3 stool samples; short follow-up                                                                        |
| McFarland et al, 1995 <sup>20</sup>               | S. boulardii starting from within 72 h of beginning anti-biotic until 3 d after last dose of anti-biotic (2 × 250 mg capsules, 30 × 10 <sup>9</sup> CFU/d) | Diarrhea among C. difficile- or toxin-positive subjects (7 wk after probiotic was discontinued) | 3/10 (30)                            | 14/96 (28.6)                 | −1.4 (−3.5 to 4.1)                                 | Compliance not reported; no significant adverse reactions due to probiotic                                                        | 4                 | Probiotic resulted in a significant reduction in the risk of AAD; only available result for CDAD was not based on a comparison between randomized subjects                                                         |
| Lewis et al, 1998 <sup>21</sup>                   | S. boulardii for duration of antibiotic treatment (2 × 113 mg capsules, CFU/d not reported)                                                                | Positive assay for C. difficile toxin (duration of antibiotic treatment)                        | 5/33 (15.2)                          | 3/36 (8.3)                   | −6.8 (−22.6 to 8.0)                                | Compliance not reported; no side effects                                                                                          | 4                 | Probiotic had no effect on AAD; C. difficile tested regularly every 4 d and whenever subjects had diarrhea; small number of CDAD cases; short follow-up                                                            |
| Thomas et al, 2001 <sup>22</sup>                  | L. GG starting within 24 h of beginning anti-biotic treatment for 14 d (capsule, 20 × 10 <sup>9</sup> CFU/d)                                               | Diarrhea and positive assay for C. difficile toxin (21 d)                                       | 2/133 (1.5)                          | 3/134 (2.2)                  | 0.7 (−3.0 to 4.5)                                  | 86.2% of probiotic subjects were compliant; same prevalence of side effects (e.g., nausea) in both groups                         | 4                 | Probiotic had no effect on AAD; C. difficile toxin results obtained from medical chart; small number of CDAD cases; short follow-up                                                                                |

Note: CFU = colony-forming unit, CI = confidence interval, AAD = antibiotic-associated diarrhea.

\*The quality of the studies was assessed using the scale described by Jadad et al.<sup>14</sup> A score of 5 indicates best quality.
